# Supplementary material
Source: PubMed Central journal article supplement (PMC7486061)
Supplement: mmc1.pdf [file mmc1.pdf]

## Supplementary Online Content

**Table I:** Initial and Maximum Laboratory values

**Table II:** Comparison of initial and maximum laboratory values for patients with stroke and COVID-19 infection

**Table III:** Antiphospholipid antibodies characteristics for patients with COVID-19 infection and stroke

**Table I:** Initial and Maximum Laboratory values

| <b>Variable</b>                                              | <b>All<br/>N=83</b> | <b>Male<br/>N=44</b> | <b>Female<br/>N=39</b> | <b>p<br/>value</b> |
|--------------------------------------------------------------|---------------------|----------------------|------------------------|--------------------|
| <i>Initial Laboratory values</i> <sup>†</sup>                |                     |                      |                        |                    |
| Prothrombin Time (sec), median (IQR)                         | 13 (4)              | 13 (5)               | 13 (3)                 | 0.94               |
| Partial Thromboplastin Time (sec), median<br>(IQR)           | 31 (9)              | 31 (12)              | 30 (9)                 | 0.97               |
| Fibrinogen level (mg/dL), median (IQR)                       | 406 (589)           | 398 (576)            | 478 (602)              | 0.44               |
| Lactate dehydrogenase (units/L), median<br>(IQR)             | 410 (320)           | 512 (341)            | 357 (238)              | <b>0.01</b>        |
| D-dimer (µg/mL), median (IQR)                                | 6 (19)              | 8 (23)               | 6 (17)                 | 0.70               |
| White cell count (x1000/ µL), median (IQR)                   | 8 (6)               | 8 (5)                | 8 (7)                  | 0.71               |
| Neutrophils (%), median (IQR)                                | 73 (23)             | 74 (66)              | 73 (17)                | 0.77               |
| Lymphocytes (%), median (IQR)                                | 10 (15)             | 8 (15)               | 13 (15)                | 0.20               |
| Monocytes (%), median (IQR)                                  | 6 (6)               | 6 (6)                | 6 (5)                  | 0.56               |
| Platelet count (x 1000/µl), median (IQR)                     | 226 (131)           | 217 (115)            | 246 (174)              | 0.24               |
| Albumin (g/dL), median (IQR)                                 | 3.0 (1.0)           | 3.0 (1.0)            | 3 (1)                  | <b>0.03</b>        |
| High-sensitivity cardiac troponin I (ng/mL),<br>median (IQR) | 0.06 (32)           | 0.06 (63)            | 0.06 (27)              | 0.93               |
| Serum ferritin (ng/mL), median (IQR)                         | 841 (1890)          | 902 (1809)           | 771 (2249)             | 0.38               |
| C-Reactive Protein (mg/L), median (IQR)                      | 35 (159)            | 44 (166)             | 35 (155)               | 0.82               |
| Erythrocyte sedimentation rate (mm/hour),<br>median (IQR)    | 61 (91)             | 62 (74)              | 58 (99)                | 0.96               |
| Total Bilirubin (mg/dL), median (IQR)                        | 0.6 (0.4)           | 0.7 (1)              | 0.5 (0.45)             | <b>0.01</b>        |

|                                           |          |           |         |             |
|-------------------------------------------|----------|-----------|---------|-------------|
| Creatinine (mg/dL), median (IQR)          | 1.3 (2)  | 1.3 (2.0) | 1.3 (2) | 0.26        |
| Blood urea nitrogen (mg/dL), median (IQR) | 22 (35)  | 24 (43)   | 19 (21) | <b>0.04</b> |
| IL-6 (µg/L), median (IQR)                 | 65 (200) | 91 (169)  | 26 (62) | 0.19        |

***Max Laboratory values***

|                                                           |             |             |             |      |
|-----------------------------------------------------------|-------------|-------------|-------------|------|
| Prothrombin Time (sec), median (IQR)                      | 16 (8)      | 16 (9)      | 15 (7)      | 0.43 |
| Partial Thromboplastin Time (sec), median (IQR)           | 56 (67)     | 56 (62)     | 55 (74)     | 0.95 |
| Fibrinogen level (mg/dL), median (IQR)                    | 598 (778)   | 411 (686)   | 618 (831)   | 0.39 |
| Lactate dehydrogenase (units/L), median (IQR)             | 581 (462)   | 658 (583)   | 482 (289)   | 0.06 |
| D-dimer (µg/mL), median (IQR)                             | 20 (24)     | 20 (26)     | 19 (24)     | 0.12 |
| White cell count (x 1,000/µL), median (IQR)               | 14 (13)     | 14 (14)     | 14 (13)     | 0.89 |
| Neutrophils (%), median (IQR)                             | 86 (30)     | 87 (65)     | 84 (24)     | 0.52 |
| Lymphocytes (%), median (IQR)                             | 16 (19)     | 14 (17)     | 18 (23)     | 0.07 |
| Monocytes (%), median (IQR)                               | 9 (7)       | 9 (8)       | 10 (7)      | 0.59 |
| Platelet count (x 1,000/ µL), median (IQR)                | 346 (191)   | 320 (169)   | 349 (177)   | 0.26 |
| Albumin (g/dL), median (IQR)                              | 3 (1)       | 3.3 (1)     | 3.1 (1)     | 0.12 |
| High-sensitivity cardiac troponin I (ng/mL), median (IQR) | 3 (81)      | 13 (190)    | 0.43 (51)   | 0.14 |
| Serum ferritin (ng/mL), median (IQR)                      | 1732 (4087) | 2217 (4117) | 1349 (2891) | 0.19 |
| C-Reactive protein (mg/L), median (IQR)                   | 152 (283)   | 196 (292)   | 96 (207)    | 0.17 |
| Sedimentation rate (mm/hour), median (IQR)                | 112 (67)    | 103 (65)    | 129 (57)    | 0.06 |

|                                           |             |           |             |             |
|-------------------------------------------|-------------|-----------|-------------|-------------|
| Total Bilirubin (mg/dL), median (IQR)     | 0.90 (1.03) | 1.25 (2)  | 0.75 (0.73) | <b>0.01</b> |
| Creatinine (mg/dL), median (IQR)          | 2.42 (4)    | 2.68 (4)  | 1.55 (5)    | 0.09        |
| Blood urea nitrogen (mg/dL), median (IQR) | 54 (62)     | 65 (69)   | 49 (57)     | 0.09        |
| IL-6 (pg/mL), median (IQR)                | 400 (325)   | 526 (126) | 0.4 (n/a)   | 0.22        |

† Normal serum markers ranges (normal low-normal high): Prothrombin Time (11.5-14.5 secs), Partial Thromboplastin Time (25-36 secs), Fibrinogen (150-400 mg/dL), Lactate dehydrogenase (90-180 units/L), D-dimer (0.0-0.5 µg/mL), white cell count (3.9-12 x 1000/ µL), % neutrophils (55-70), % lymphocytes (20-40), % monocytes (2-8), platelet count (150-450 x 1000/ µL), albumin (3.4-5), high-sensitivity cardiac troponin I (0.0-0.04 ng/mL), ferritin (5-116 ng/mL), C-Reactive protein (0-8 mg/L), sedimentation rate (0-20 mm/hour), total bilirubin (0-1.2 mg/dL), creatinine (0.4-1.2 mg/dL), Blood urea nitrogen (6-20 mg/dL), IL-6 (0-2 pg/mL).

**Table II:** Comparison of initial and maximum laboratory values for patients with stroke and COVID-19 infection

| Laboratory values                           | Initial      | Maximum      | <i>p-value</i> |
|---------------------------------------------|--------------|--------------|----------------|
|                                             | Median (IQR) | Median (IQR) |                |
| PT (sec)                                    | 13 (4)       | 16 (8)       | <0.01          |
| PTT (sec)                                   | 31 (9)       | 56 (67)      | <0.01          |
| Fibrinogen level (mg/dL)                    | 406 (589)    | 598 (778)    | <0.01          |
| LDH (units/L)                               | 410 (320)    | 581 (462)    | <0.01          |
| D-dimer ( $\mu\text{g/mL}$ )                | 6 (19)       | 20 (24)      | <0.01          |
| White cell count (x 1000/ $\mu\text{L}$ )   | 8 (6)        | 14 (13)      | <0.01          |
| Neutrophils (%)                             | 73 (23)      | 86 (30)      | <0.01          |
| Lymphocytes (%)                             | 10 (15)      | 16 (19)      | <0.01          |
| Monocytes (%)                               | 6 (6)        | 9 (7)        | <0.01          |
| Platelet count (x 1000/ $\mu\text{l}$ )     | 226 (131)    | 346 (191)    | <0.01          |
| Albumin (g/dL)                              | 3.0 (1.0)    | 3 (1)        | <0.01          |
| High-sensitivity cardiac troponin I (ng/mL) | 0.06 (32)    | 3 (81)       | <0.01          |
| Serum ferritin (ng/mL)                      | 841 (1890)   | 1732 (4087)  | <0.01          |
| CRP (mg/L)                                  | 35 (159)     | 152 (283)    | <0.01          |
| ESR (mm/hour)                               | 61 (91)      | 112 (67)     | 0.04           |
| Total bilirubin (mg/dL)                     | 0.6 (0.4)    | 0.90 (1.03)  | <0.01          |
| Creatinine (mg/dL)                          | 1.3 (2)      | 2.42 (4)     | <0.01          |
| Blood urea nitrogen (mg/dL)                 | 22 (35)      | 54 (62)      | <0.01          |
| IL-6 ( $\mu\text{g/L}$ )                    | 65 (200)     | 400 (325)    | 0.11           |

Normal serum markers ranges (normal low-normal high): PT=Prothrombin Time (11.5-14.5 secs), PTT=Partial Thromboplastin Time (25-36 secs), Fibrinogen (150-400 mg/dL), LDH=Lactate dehydrogenase (90-180 units/L), D-dimer (0.0-0.5 µg/mL), white cell count (3.9-12 x 1000/ µL), % neutrophils (55-70), % lymphocytes (20-40), % monocytes (2-8), platelet count (150-450 x 1000/ µL), albumin (3.4-5), high-sensitivity cardiac troponin I (0.0-0.04 ng/mL), ferritin (5-116 ng/mL), CRP=C-Reactive protein (0-8 mg/L), ESR=erythrocyte sedimentation rate (0-20 mm/hour), total bilirubin (0-1.2 mg/dL), creatinine (0.4-1.2 mg/dL), Blood urea nitrogen (6-20 mg/dL), IL-6-Interleukin-6 (0-2 pg/mL).

**Table III:** Antiphospholipid antibodies characteristics for patients with COVID-19 infection and stroke

| <b>Patient</b> | <b>Age<br/>(years)</b> | <b>COVID<br/>severity*</b> | <b>Stroke Location</b>           | <b>Anti-cardiolipin<br/>antibody titers<sup>†</sup></b> | <b>Anti-β2-<br/>glycoprotein-<br/>1 Antibody</b> |
|----------------|------------------------|----------------------------|----------------------------------|---------------------------------------------------------|--------------------------------------------------|
| 1              | 63                     | Mild<br>symptoms           | Lobar                            | IgG: 23 gpl<br>IgM: 28 mpl                              | n/a                                              |
| 2              | 72                     | Mild/moderate              | Cerebellar                       | IgG <1.6 gpl<br>IgM: 8.9 mpl                            | n/a                                              |
| 3              | 64                     | Severe                     | Lobar                            | IgG: 26.9 gpl<br>IgM: 52.1 mpl                          | n/a                                              |
| 4              | 40                     | Severe                     | Mixed lobar and<br>basal ganglia | IgG <9 g/L gpl<br>IgM: 14.8 mpl                         | n/a                                              |
| 5              | 71                     | Severe                     | Lobar                            | IgG <9 gpl<br>IgM: 24.5 mpl                             | IgG <9 gpl<br>IgM <9 mpl                         |
| 6              | 58                     | Mild/moderate              | Lobar, bilateral                 | IgG <14 gpl<br>IgM <12 mpl                              | IgG <9 gpl<br>IgM <9 mpl                         |
| 7              | 31                     | Severe                     | Lobar and brain<br>stem          | IgG: 22 gpl<br>IgM: 18 mpl                              | IgG <9 gpl<br>IgM <9 mpl                         |
| 8              | 53                     | Severe                     | Lobar and brain<br>stem          | IgG: 1.6 gpl<br>IgM: 2.8 mpl                            | IgG <6.4 gpl<br>IgM <1.1 mpl                     |
| 9              | 39                     | Mild/moderate              | Lobar                            | IgG <2.6 gpl<br>IgM: 1.1 mpl                            | IgG: 6.7 gpl<br>IgM <1.1 mpl                     |

|    |    |               |                                                             |                              |                            |
|----|----|---------------|-------------------------------------------------------------|------------------------------|----------------------------|
| 10 | 43 | Mild/moderate | Transverse sinus<br>thrombosis with<br>lobar<br>involvement | IgG <1.6 gpl<br>IgM: 0.6 mpl | IgG: 0 gpl<br>IgM <3.0 mpl |
|----|----|---------------|-------------------------------------------------------------|------------------------------|----------------------------|

\* Covid severity reported as asymptomatic, mild/moderate, or severe (defined as requiring ICU admission and mechanical ventilation)

†Antibodies reported as IgM Phospholipid Units (mpl, 1 mpl unit is 1 microgram of IgM antibody) or IgG Phospholipid Units (gpl; 1 gpl unit is 1 microgram of IgG antibody). Reference values: negative: 0-14 mpl or gpl; indeterminate: 15-19 mpl or gpl; low to moderately positive: 20-80 mpl or gpl; high positive:  $\geq 81$  mpl or gpl.
